# Supplementary material
Source: Springer Nature journal article supplement (https://www.springermedizin.de/resource/supplementary/12885_2012_3314_MOESM7_ESM.pdf/9463220)

Additional file - Fig. S3

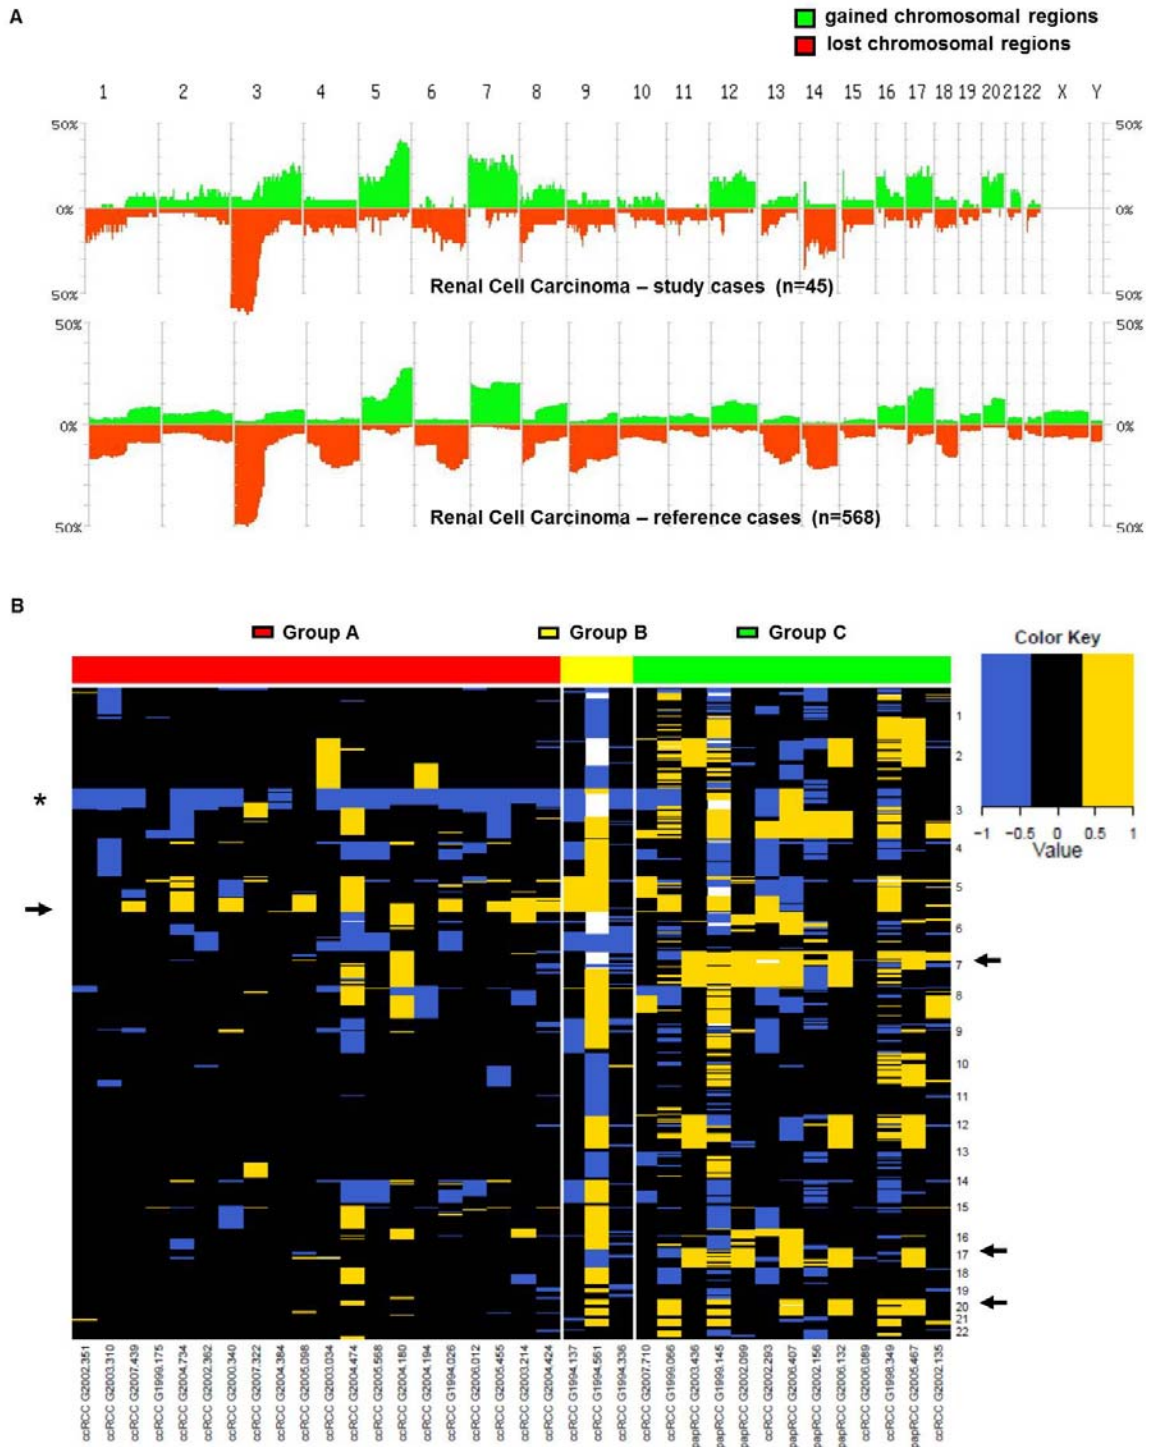

Supplement: MOESM7 [file 9463220]
